# Supplementary material
Source: publisher site journal article supplement (https://www.dovepress.com/get_supplementary_file.php?f=307778.docx)
Supplement: Supplementary file 1 [file get_supplementary_file.php]

**SDC; Table S1** – Grouping of dosages for immunosuppression

| **Group** | **Low dose** | **Standard dose** | **High dose** |
| --- | --- | --- | --- |
| **Tac**  **CyA** | < 3  < 50 | 3 - 5  50 - 100 | >5  > 100 |
| **EVR** | < 3 | 3 - 5 | >5 |
| **MMF** | ≤ 1 g | > 1 g | > 1 g |

**SDC; Table S2** –Donor characteristics

| **Patient characteristics** (n=291) | **Values** n (%) / median (min; max) |
| --- | --- |
| **Gender**  Male  Female | **285* (97.9)**  157 (55.1)  128 (44.9) |
| **Age at time of death (in years)**  < 50  >/= 50 | **285 (97.9) / 51 (10; 89)**  132 (46.3)  153 (53.7) |
| **BMI (in kg/m²)**  Underweight (BMI < 18)  Normal weight (BMI 18-25)  Overweight (BMI 26-29)  Obesity (BMI > 29) | **274** (94.2) / 24,69 (15; 46)**  1 (0.4)  161 (58.8)  82 (29.9)  30 (10.9) |
| **ICU-time** | **287 (98.6) / 3 (0; 49)** |

*, ** available data for analyzed characteristics

**SDC; Table S3 –** Logistic regression for Fibrosis

| **Fibrosis** |  |  |  |  |  |  |
| --- | --- | --- | --- | --- | --- | --- |
| **Parameter** | **Estimate** | **Std. Error** | **OR** | **Lower**  **95% CI** | **Upper**  **95% CI** | **p value** |
| Intercept | -0.50 | 0.31 |  |  |  | 0.1071 |
| Only HLA (vs. noHLAab, noDSA) | 0.29 | 0.46 | 1.34 | 0.53 | 3.32 | 0.5282 |
| HLAab & DSA (vs. noHLAab, no-DSA) | -0.02 | 0.37 | 0.98 | 0.48 | 2.01 | 0.9601 |
| HCC (vs. noHCC) | 0.24 | 0.40 | 1.27 | 0.57 | 2.81 | 0.5482 |
| Viral yes | -0.22 | 0.36 | 0.81 | 0.39 | 1.62 | 0.5493 |
| Female (vs. male) | 0.03 | 0.33 | 1.03 | 0.54 | 1.97 | 0.9325 |
| McFadden R² | Cox and  Snell R² | Nagelkerke R² | DF diff | Log. Lik. diff | Chi² | c-statistic |
| 0.0043 | 0.0057 | 0.0078 | -5 | -0.5 | 1.0 | 54.8 |

**SDC; Table S4 –** Logistic regression for Steatosis

| **Steatosis** |  |  |  |  |  |  |
| --- | --- | --- | --- | --- | --- | --- |
| **Parameter** | **Estimate** | **Std. Error** | **OR** | **Lower**  **95% CI** | **Upper**  **95% CI** | **p value** |
| Intercept | -1.59 | 0.33 |  |  |  | 0.0000 |
| Only HLAab (vs. noHLAab, noDSA) | -0.20 | 0.60 | 0.82 | 0.22 | 2.48 | 0.7428 |
| HLA, DSA (vs. noHLAab, noDSA) | -1.24 | 0.66 | 0.29 | 0.06 | 0.95 | 0.0621 |
| Viral yes | 0.10 | 0.47 | 1.11 | 0.43 | 2.74 | 0.8267 |
| McFadden R² | Cox and  Snell R² | Nagelkerke R² | DF diff | Log. Lik. diff | Chi² | c-statistic |
| 0.0341 | 0.0267 | 0.0488 | -3 | -2.40 | 4.79 | 61.4 |

**SDC; Table S5 –** Logistic regression for Mesh wire fibrosis

| **Mesh wire fibrosis** |  |  |  |  |  |  |
| --- | --- | --- | --- | --- | --- | --- |
| **Parameter** | **Estimate** | **Std. Error** | **OR** | **Lower**  **95% CI** | **Upper**  **95% CI** | **p value** |
| Intercept | -1.18 | 0.36 |  |  |  | 0.0009 |
| Only HLAab (vs. noHLAab, noDSA) | 0.38 | 0.50 | 1.46 | 0.53 | 3.8 | 0.4478 |
| HLAab, DSA (vs. noHLAab, noDSA) | 0.54 | 0.40 | 1.71 | 0.78 | 3.75 | 0.1798 |
| HCC (vs. noHCC) | 0.64 | 0.43 | 1.89 | 0.81 | 4.39 | 0.1361 |
| Viral yes | -0.43 | 0.41 | 0.65 | 0.28 | 1.42 | 0.2885 |
| Female (vs. male) | 0.01 | 0.36 | 1.01 | 0.49 | 2.07 | 0.9765 |
| McFadden R² | Cox and Snell R² | Nagelkerke R² | DF diff | Log. Lik. diff | Chi² | c-statistic |
| 0.0260 | 0.0306 | 0.0439 | -5 | -2.68 | 5.37 | 61 |
